# Supplementary material
Source: publisher figshare collection journal article supplement (https://acs.figshare.com/ndownloader/files/4170265)
Supplement: Supplementary file 1 [file 4170265]

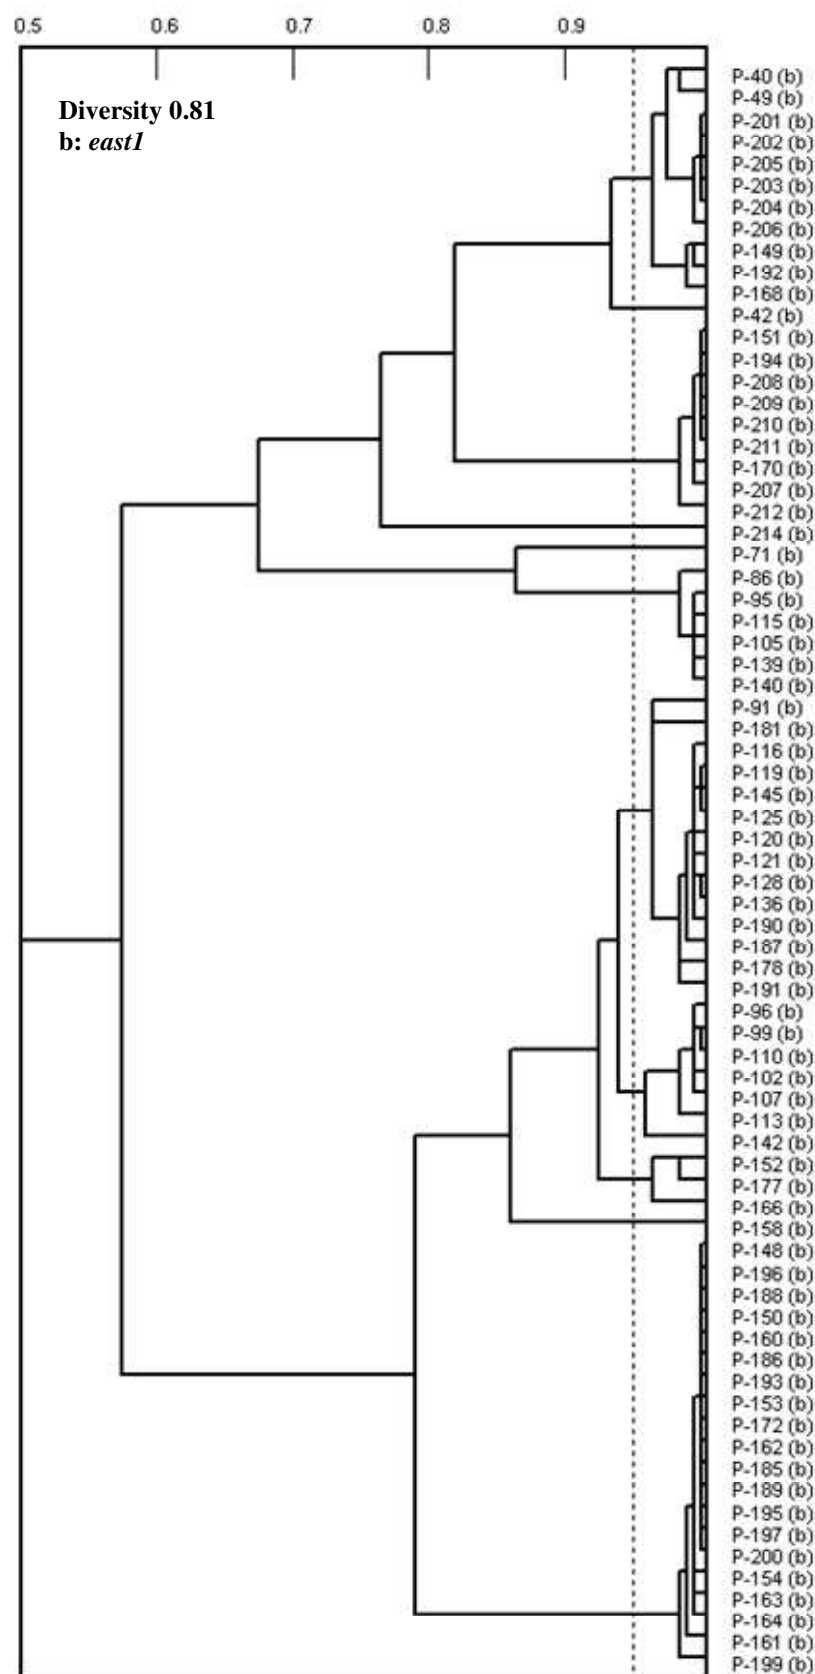

SUPPLEMENTARY FIGURE 3. An UPGMA dendrogram showing biochemical phenotypes (BPTs) of *Escherichia coli* isolates harbouring toxin genes in possum fecal samples.
